# Supplementary material for: Rapid deacetylation of yeast Hsp70 mediates the cellular response to heat stress
Source: PubMed Central journal article supplement (PMC6838335; doi:10.1038/s41598-019-52545-3), 2019-11-07
Supplement: 41598_2019_52545_MOESM1_ESM.pdf [file 41598_2019_52545_MOESM1_ESM.pdf]

## Supplementary information for:

### Rapid deacetylation of yeast Hsp70 mediates the cellular response to heat stress

Linan Xu<sup>1</sup>, Nitika<sup>2</sup>, Naushaba Hasin<sup>3</sup>, Daragh D. Cuskelly<sup>1</sup>, Donald Wolfgeher<sup>4</sup>, Sean Doyle<sup>1</sup>, Paul Moynagh<sup>1</sup>, Sarah Perrett<sup>5,6</sup>, Gary W. Jones<sup>1,7\*</sup>, Andrew W. Truman<sup>2\*</sup>

<sup>1</sup>Department of Biology, Maynooth University, Maynooth, Co. Kildare, Ireland.

<sup>2</sup>Department of Biological Sciences, University of North Carolina at Charlotte, Charlotte, USA.

<sup>3</sup>Institute for Genome Sciences, University of Maryland Baltimore, Baltimore, USA

<sup>4</sup>Department of Molecular Genetics and Cell Biology, The University of Chicago, Chicago, USA

<sup>5</sup>National Laboratory of Biomacromolecules, CAS Center for Excellence in Biomacromolecules, Institute of Biophysics, Chinese Academy of Sciences, Beijing 100101, China.

<sup>6</sup>University of the Chinese Academy of Sciences, 19A Yuquan Road, Shijingshan District, Beijing 100049, China.

<sup>7</sup>Centre for Biomedical Science Research, School of Clinical and Applied, Leeds Beckett University, Portland Building, City Campus, Leeds LS1 3HE, United Kingdom.

\*Corresponding authors

E-mail: gary.jones@leedsbeckett.ac.uk (GJ) or A.Truman@uncc.edu (AT)

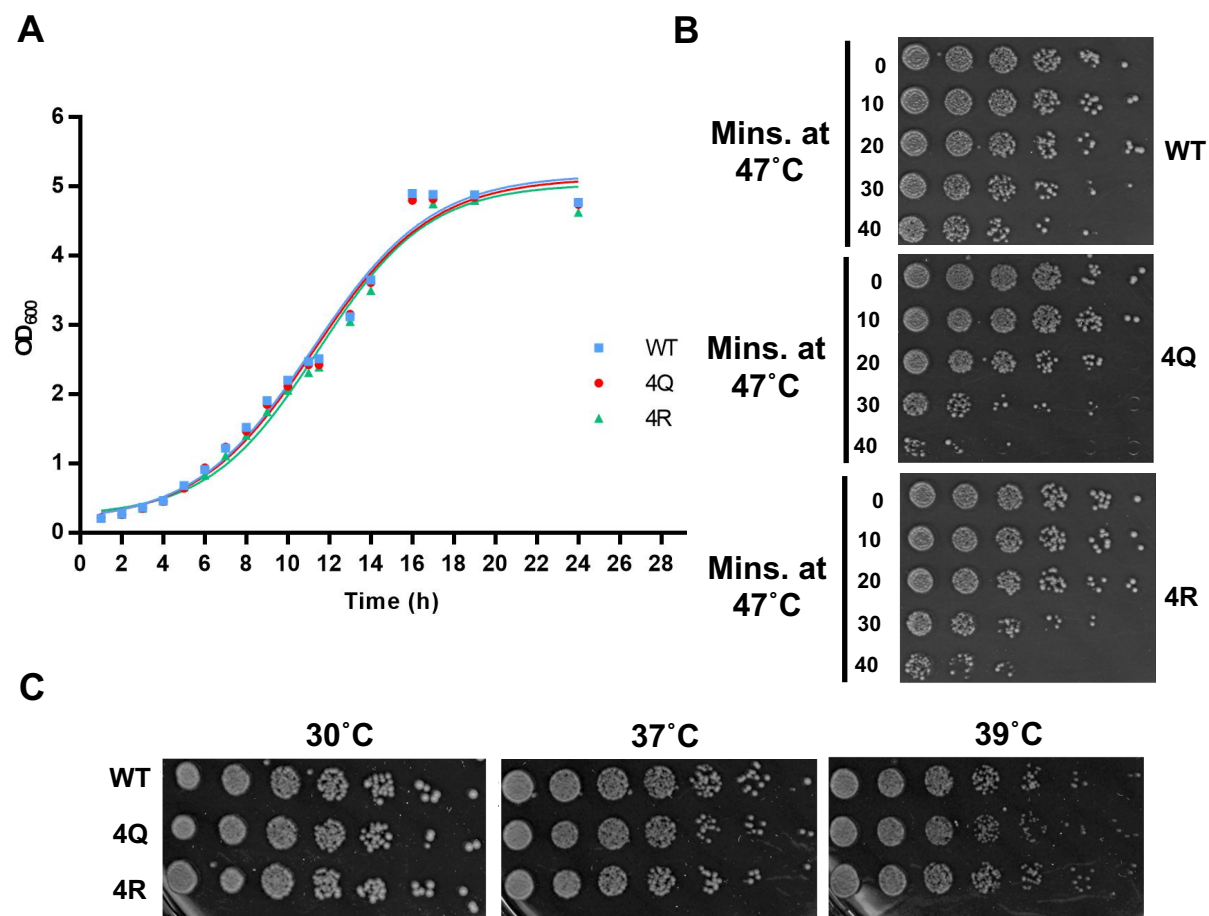

**Fig. S1. Growth evaluation of MH272 strains.** (A) Growth curves of MH272 strains at 30°C in YPD. (B) Growth assay of the (de)acetylated mutations in Ssa1 at elevated temperatures. (C) Acquired thermotolerance assay of (de)acetylation mutations of Ssa1 at extreme temperature. Fresh cultures were pre-treated at 39°C for 1 h, then cells were heat shocked in a 50°C incubator for a time course (T0-T4 means 0, 10, 20, 30 and 40 min, respectively).

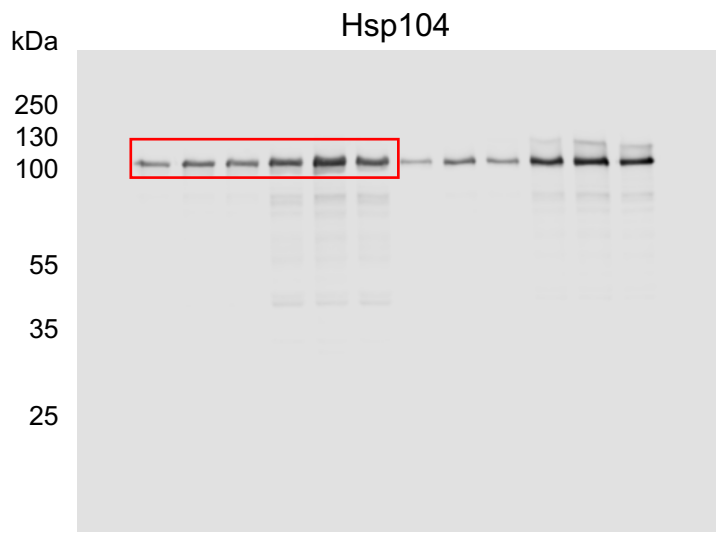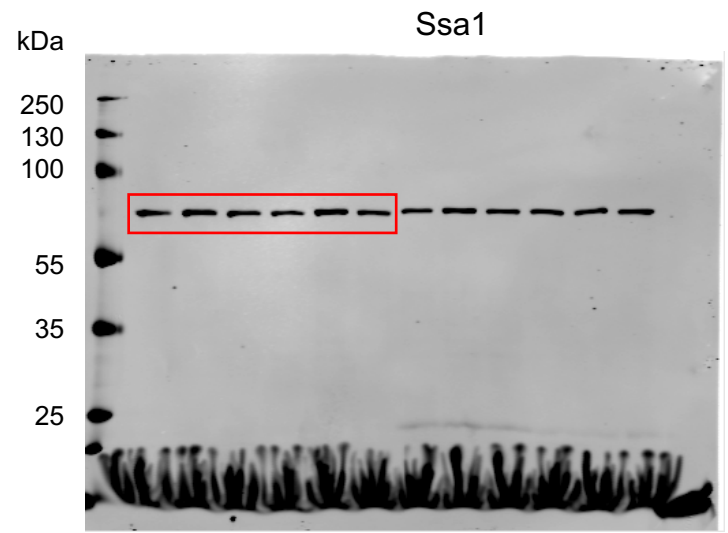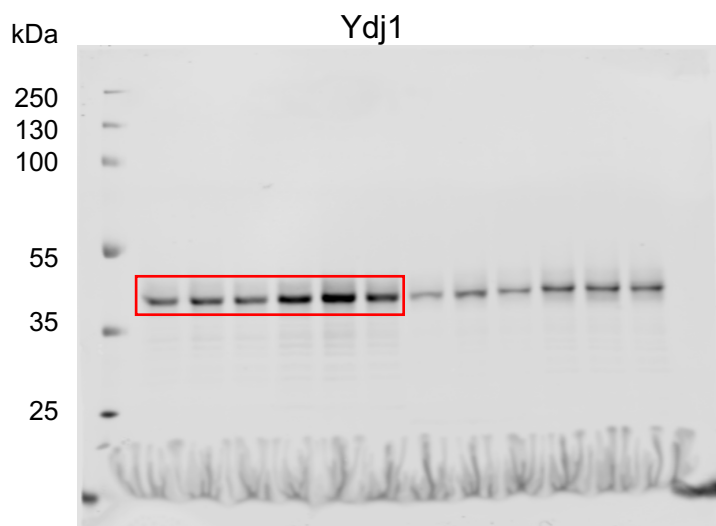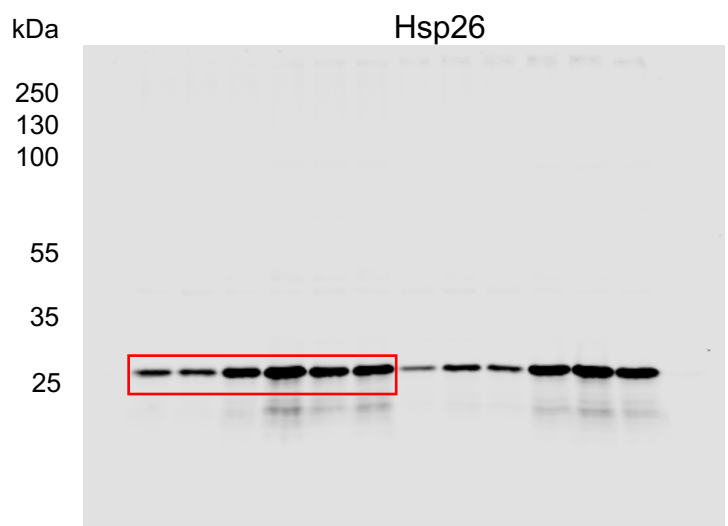

**Fig. S2. Original blots for data shown in Fig. 3D.** Regions used in Fig. 3D are highlighted in red. MW are labelled along with primary antibody used.

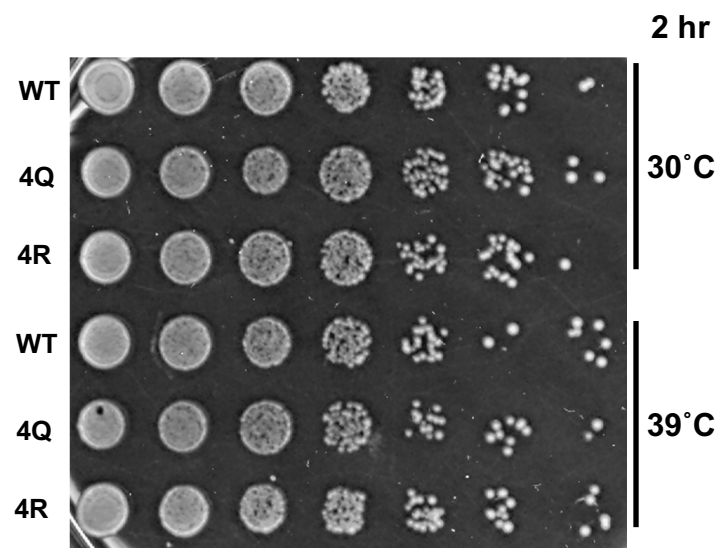

**Fig. S3. Viability G402 strains post-heat shock.** Yeast expressing acetylation site mutations were grown to exponential phase, and then fresh cultures were heat shocked at 39°C for 2 h. Cells serially diluted fivefold and plated onto YPD plates. Plates were photographed after 2 days incubation at 30°C.
